# Supplementary material
Source: PubMed Central journal article supplement (PMC2793120)
Supplement: jn.109.111450_1.pdf [file jn.109.111450_1.pdf]

Online Supporting Material

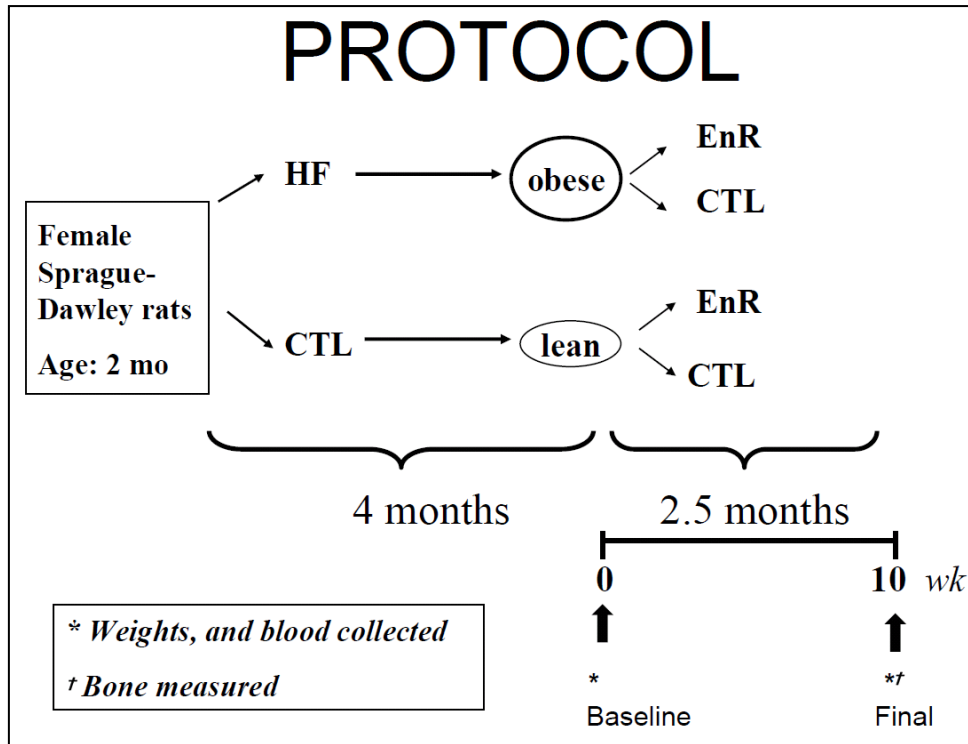

**Supplemental Figure 1.** Protocol: Dietary intervention and timing of measurements  
Abbreviations: CTL (control diet), EnR (40% energy restricted), HF (high fat diet)
