# Supplementary material
Source: PubMed Central journal article supplement (PMC2793120)
Supplement: jn.109.111450_2.pdf [file jn.109.111450_2.pdf]

**Online supporting Material**

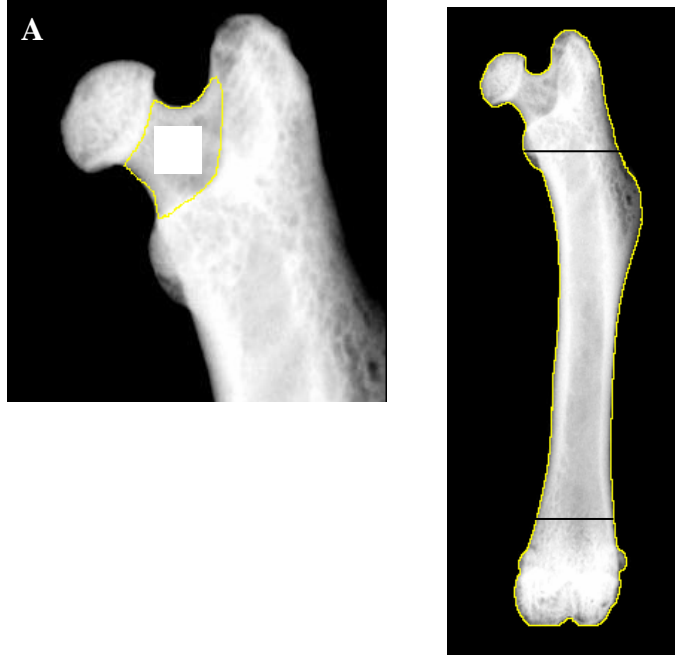

**Supplemental Figure 2.** Bone sites shown for bone mineral density measurements.  
A. Femoral neck is outlined, and box within bone area represents the trabecular region.  
B. Proximal and distal femur is measured to 20% from the proximal or distal ends.
