# Supplementary material
Source: PubMed Central journal article supplement (PMC2793120)
Supplement: jn.109.111450_3.pdf [file jn.109.111450_3.pdf]

## Online supporting Material

**Supplemental Table 1.** Composition and calcium and energy content of study diets during 10 wk of intervention <sup>1,2</sup>

| INGREDIENT                       | CTL    | EnR   |
|----------------------------------|--------|-------|
|                                  | g      |       |
| Casein                           | 140    | 140   |
| L-Cystine                        | 1.8    | 1.8   |
| L-Cystine                        | 520.7  | 214.1 |
| Maltodextrin                     | 100    | 75    |
| Sucrose                          | 100    | 46.6  |
| Cellulose                        | 50     | 50    |
| Soybean Oil                      | 10     | 10    |
| Lard                             | 30     | 30    |
| TBHQ                             | 0.008  | 0.008 |
| Mineral mix S10022M <sup>3</sup> | 35     | 35    |
| Vitamin mix V10037 <sup>3</sup>  | 10     | 10    |
| Choline Bitartrate               | 2.5    | 2.5   |
| Total Weight (g)                 | 1000.1 | 615.1 |
| Calcium (mg/g diet)              | 5.0    | 8.1   |
| Phosphorus (mg/g diet)           | 3.0    | 4.9   |
| Energy (kJ/g diet)               | 15.2   | 15.0  |
| % Energy                         |        |       |
| Carbohydrate                     | 75.6   | 59.1  |
| Protein                          | 14.9   | 25.0  |
| Fat                              | 9.5    | 15.9  |

<sup>1</sup>Prepared by Research diets, Inc., New Brunswick, NJ

<sup>2</sup>Diet abbreviations: CTL = control for mature rats; EnR = 40% energy restriction.

<sup>3</sup> See Reference 21
